# Supplementary material for: ortho-Chlorination of phenoxy 1,2-dioxetane yields superior chemiluminescent probes forin vitroandin vivoimaging
Source: Royal Society of Chemistry journal article supplement (doi:10.1039/c8ob00087e), 2018-01-01
Supplement: c8ob00087e1.pdf [file c8ob00087e1.pdf]

***Ortho*-Chlorination of phenoxy 1,2-dioxetane yields superior chemiluminescence probes for *in vitro* and *in vivo* imaging**

Tal Eilon-Shaffer<sup>a‡</sup>, Michal Roth-Konforti<sup>a‡</sup>, Anat Eldar-Boock<sup>b</sup>, Ronit Satchi-Fainaro<sup>b</sup>,  
and Doron Shabat<sup>a\*</sup>

<sup>‡</sup>T.E.-S. and M.R.-K. contributed equally

<sup>a</sup>School of Chemistry, Raymond and Beverly Sackler Faculty of Exact Sciences and

<sup>b</sup>Department of Physiology and Pharmacology, Sackler School of Medicine, Tel Aviv  
University, Tel Aviv 69978 Israel.

## Supporting Information

|                                                    |         |
|----------------------------------------------------|---------|
| Supplementary Figures.....                         | S2      |
| Synthetic Schemes and Experimental Procedures..... | S8-S13  |
| NMR and MS Spectra of Key Compounds.....           | S14-S23 |
| <i>In Vitro</i> Experiments.....                   | S24     |
| <i>In Vivo</i> Experiments.....                    | S24-S25 |
| References.....                                    | S25     |

## Supplementary Figures

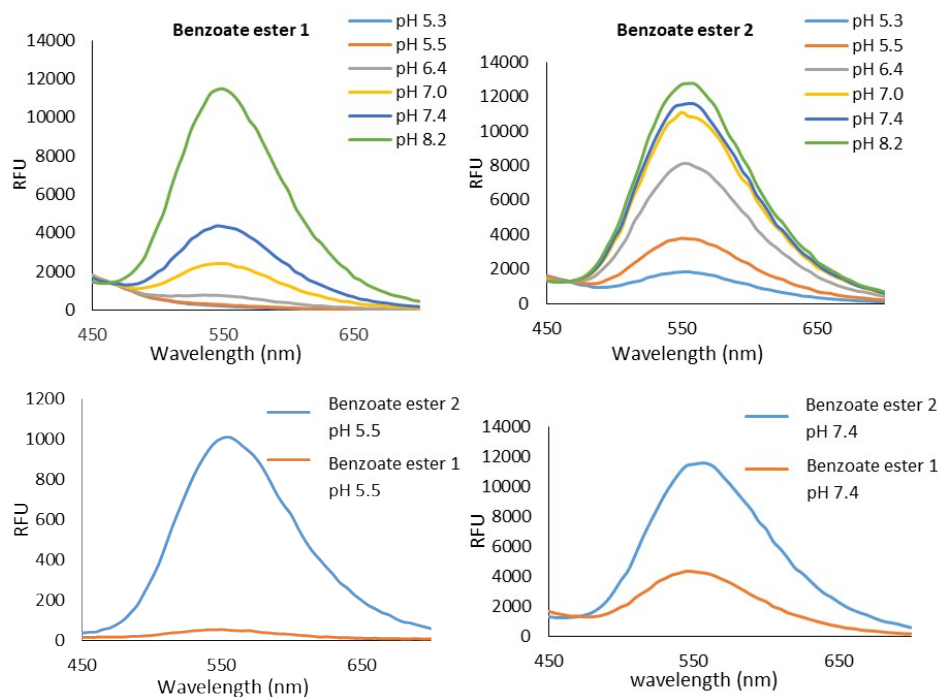

**Figure S1.** Fluorescence emission spectra of benzoate esters **1** and **2** [50  $\mu$ M] in PBS, different pH and 5% DMSO, Ex: 400 nm.

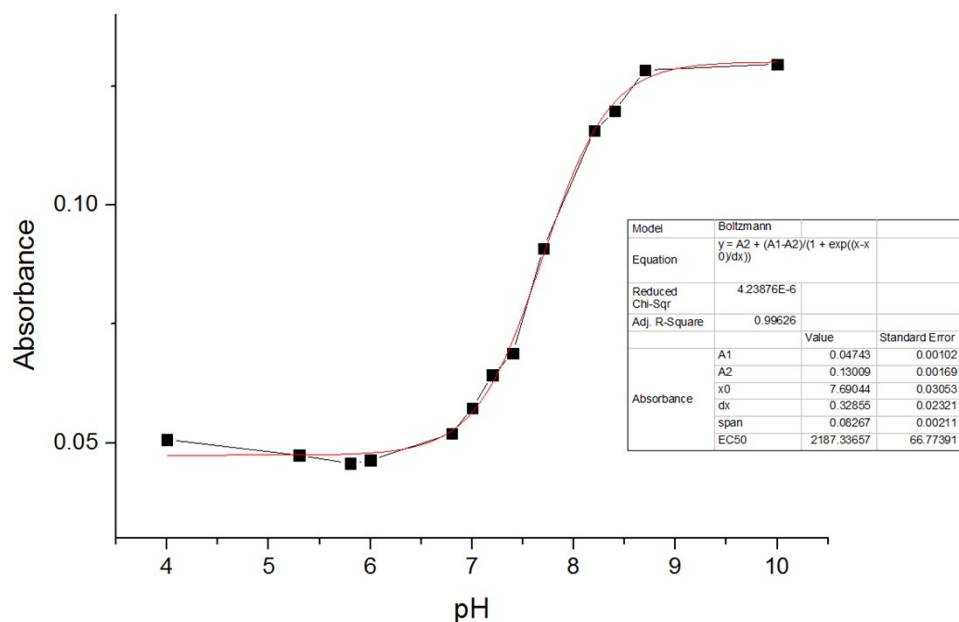

**Figure S2.** Single pKa calculation of **benzoate 1b** via Boltzmann fit in Origin software. The absorbance measurements were done in triplicates and the pKa calculated was averaged and taken as the pKa value.

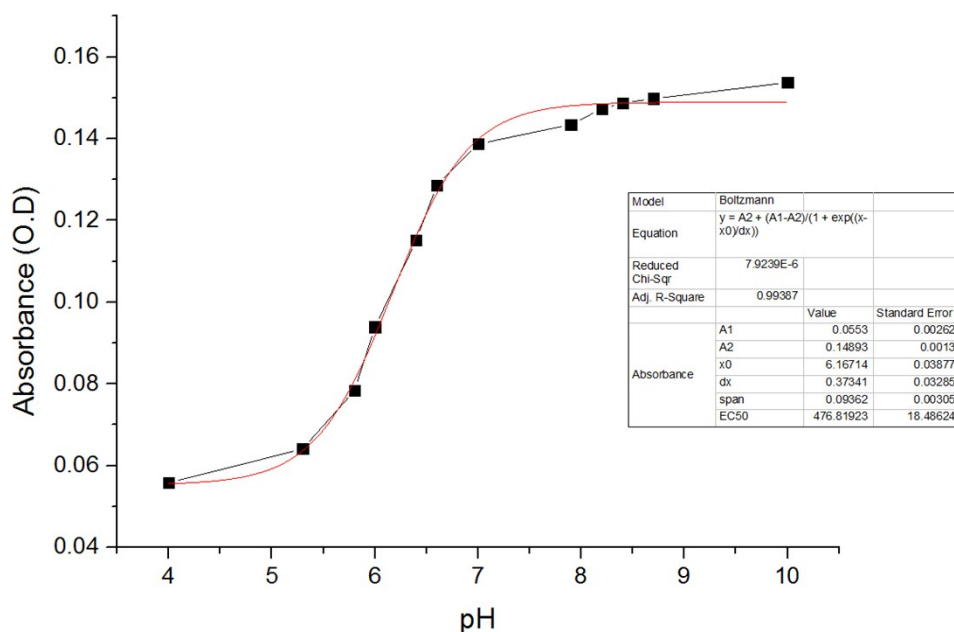

**Figure S3.** Single pKa calculation of **benzoate 2b** via Boltzmann fit in Origin software. The absorbance measurements were done in triplicates and the pKa calculated was averaged and taken as the pKa value.

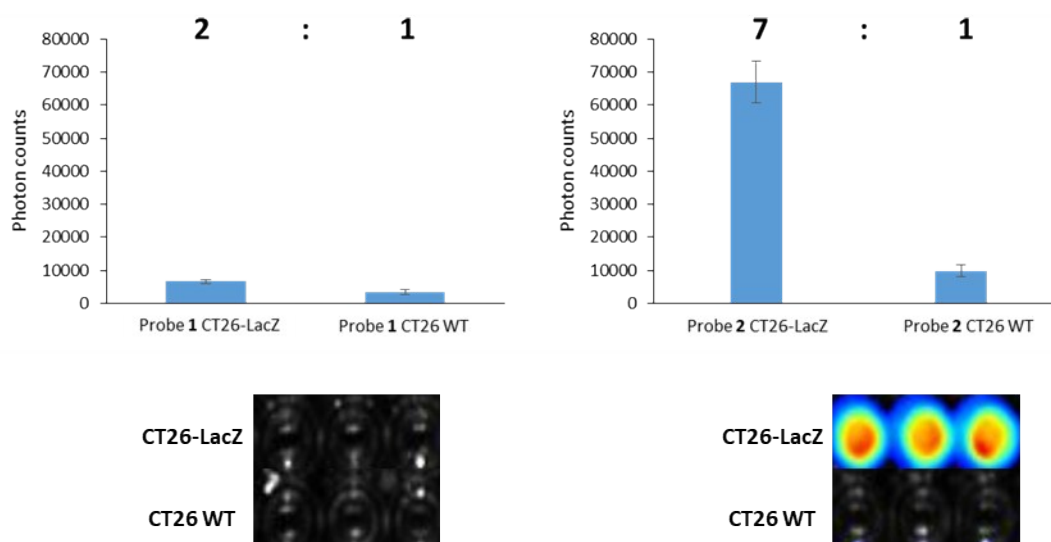

**Figure S4.** Chemiluminescent imaging and signal quantification of probes **1** and **2** [5  $\mu$ M] in murine CT26 colon carcinoma cells.

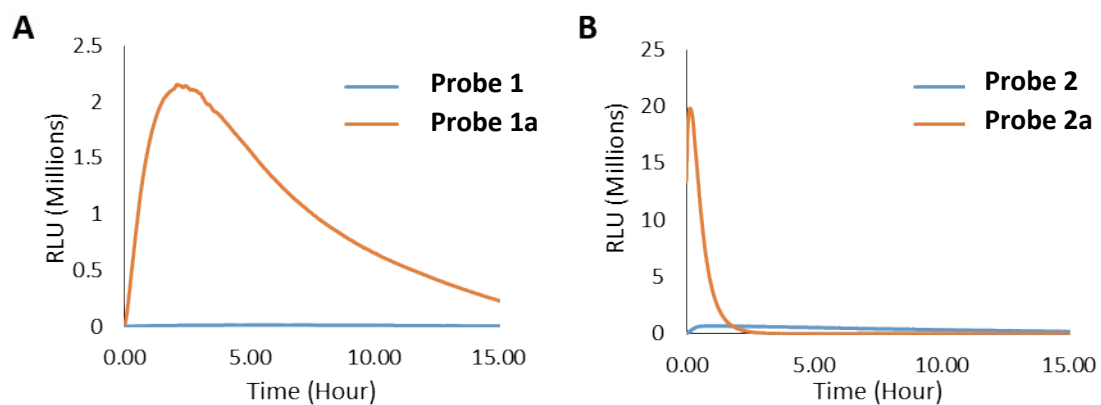

**Figure S5.** (A) Chemiluminescent kinetic profile for probes **1** and **1a** [100  $\mu$ M] upon activation with 1.5 units/mL  $\beta$ -galactosidase in PB pH 5.5, 1% DMSO at 37°C. (B) Chemiluminescent kinetic profile for probes **2** and **2a** [100  $\mu$ M] upon activation with 1.5 units/mL  $\beta$ -galactosidase in PB pH 5.5, 1% DMSO at 37°C.

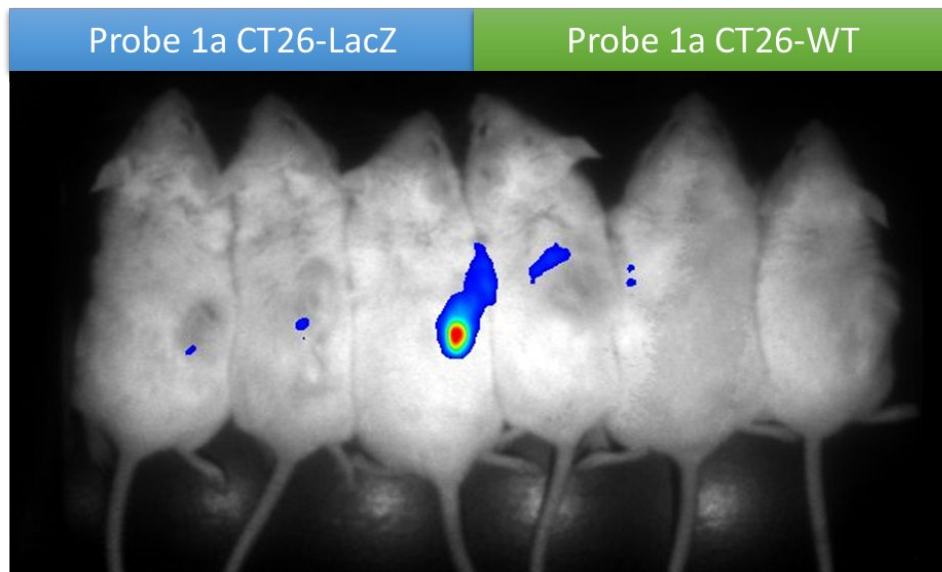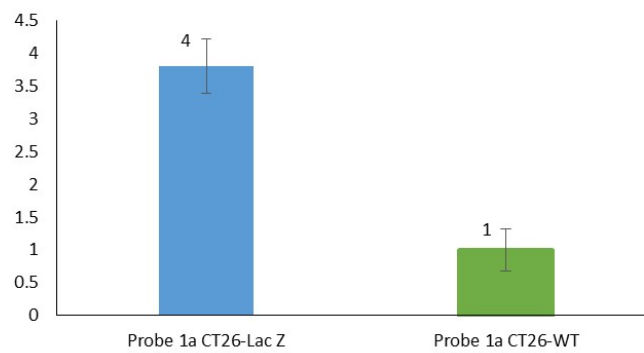

**Figure S6.** (Top) *in vivo* imaging triplicates of endogenous  $\beta$ -galactosidase in murine CT26 colon carcinoma tumors. Probe **1a**, 100  $\mu$ L of 100  $\mu$ M was injected intratumorally (IT). (Bottom) Normalized values of signal intensities measured for probe **1a** with CT26-LacZ and CT26-WT.

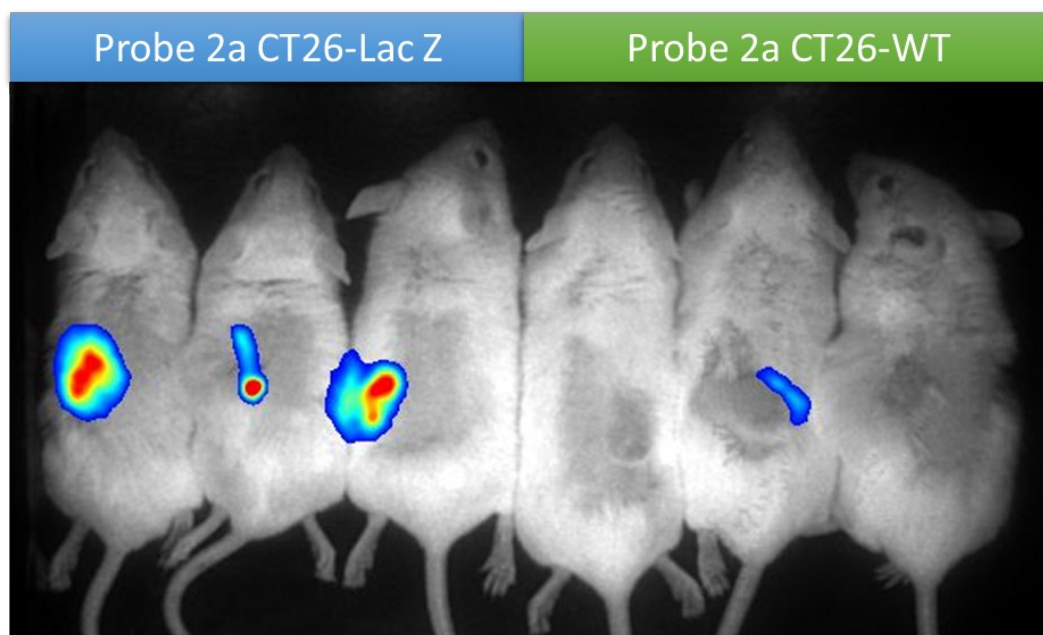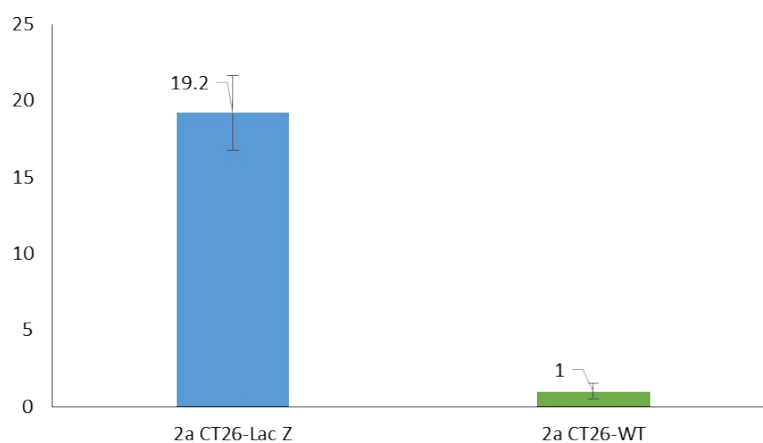

**Figure S7.** (Top) *in vivo* imaging triplicates of endogenous  $\beta$ -galactosidase in murine CT26 colon carcinoma tumors. Probe **2a**, 100  $\mu$ L of 100  $\mu$ M was injected intratumorally (IT). (Bottom) Normalized values of signal intensities measured for probe **2a** with CT26-LacZ and CT26-WT.

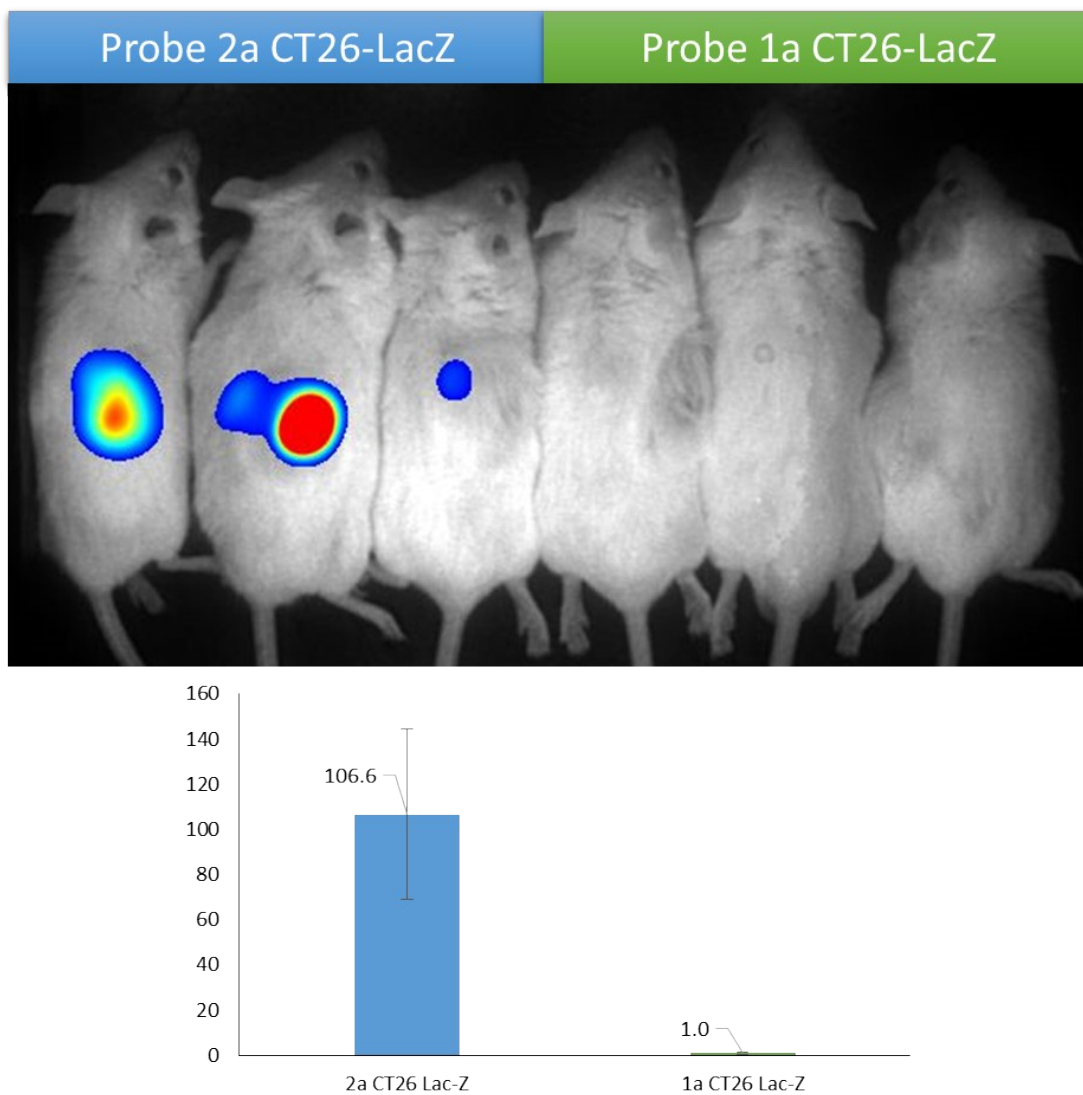

**Figure S8.** (Top) *in vivo* imaging triplicates of endogenous  $\beta$ -galactosidase in CT26 tumors. Probes **1a** and **2a**, 100  $\mu$ L of 100  $\mu$ M were injected intratumorally (IT). (Bottom) Normalized values of signal intensities measured for probe **2a** with CT26-LacZ compared to probe **1a** with CT26-LacZ.

## General methods

All reactions requiring anhydrous conditions were performed under an Argon atmosphere. All reactions were carried out at room temperature unless stated otherwise. Chemicals and solvents were either A.R. grade or purified by standard techniques. Thin layer chromatography (TLC): silica gel plates Merck 60 F<sub>254</sub>: compounds were visualized by irradiation with UV light. Column chromatography (FC): silica gel Merck 60 (particle size 0.040-0.063 mm), eluent given in parentheses. Reverse-phase high pressure liquid chromatography (RP-HPLC): C18 5u, 250x4.6 mm, eluent given in parentheses. Preparative RP-HPLC: C18 5u, 250x21mm, eluent given in parentheses. <sup>1</sup>H-NMR spectra were measured using Bruker Avance operated at 400MHz. <sup>13</sup>C-NMR spectra were measured using Bruker Avance operated at 100 MHz. Chemical shifts were reported in ppm on the  $\delta$  scale relative to a residual solvent (CDCl<sub>3</sub>:  $\delta$  = 7.26 for <sup>1</sup>H-NMR and 77.16 for <sup>13</sup>C-NMR, DMSO-d<sub>6</sub>:  $\delta$  = 2.50 for <sup>1</sup>H-NMR and 39.52 for <sup>13</sup>C-NMR). Mass spectra were measured on Waters Xevo TQD. Chemiluminescence was recorded on Molecular Devices Spectramax i3x. All general reagents, including salts and solvents, were purchased from Sigma-Aldrich. Light irradiation for photochemical reactions: LED PAR38 lamp (19W, 3000K).

**Abbreviations.** **ACN**- Acetonitrile, **DCM**- Dichlorometane, **DIPEA**- diisopropylethylamine, **DMF**- N,N'-Dimethylformamide, **Et<sub>2</sub>O**- diethylether, **Et<sub>3</sub>N**- Triethylamine, **EtOAc**- Ethylacetate, **HBTU**- 2-(1*H*-benzotriazol-1-yl)-1,1,3,3-tetramethyluronium hexafluorophosphate, **K<sub>2</sub>CO<sub>3</sub>**- potassium carbonate, **MeOH**- Methyl alcohol, **NH<sub>4</sub>Cl**- ammonium chloride, **Na<sub>2</sub>S<sub>2</sub>O<sub>3</sub>**- Sodium Thiosulfate, **Na<sub>2</sub>SO<sub>4</sub>**- Sodium Sulfate, **TMS-Cl** - Trimethylsilyl chloride, **TFA**- Trifluoroacetic acid, **TIPS**- Triisopropylsilane



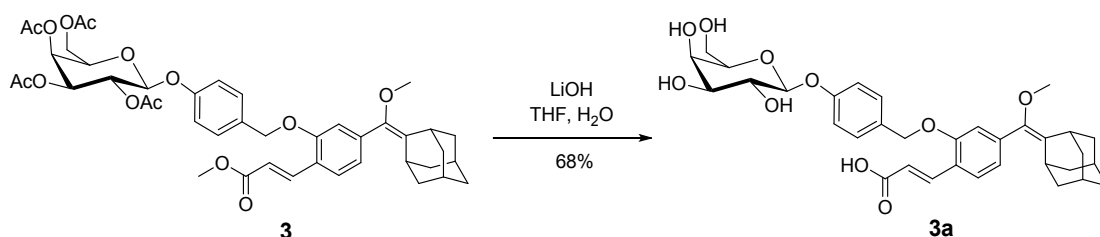

### Compound 3a

Enol ether **3**<sup>[1]</sup> (120 mg, 0.147 mmol, 1 eq), LiOH (21.3 mg, 0.887 mmol, 6 eq) were dissolved in 2 ml of 4:1 solution THF:H<sub>2</sub>O. Reaction mixture was stirred at room temperature and monitored via RP-HPLC. Upon completion, reaction mixture was diluted with EtOAc and washed with saturated aqueous NH<sub>4</sub>Cl solution followed by brine. Organic phase was dried over Na<sub>2</sub>SO<sub>4</sub> and concentrated under reduced pressure to afford 64 mg (68% yield) of off-white solid. <sup>1</sup>H NMR (400 MHz, CDCl<sub>3</sub>) δ 7.95 – 7.84 (m, J = 16.1 Hz, 1H), 7.41 (d, J = 8.0 Hz, 1H), 7.26 (d, J = 8.6 Hz, 2H), 7.01 (d, J = 8.5 Hz, 2H), 6.89 (s, 1H), 6.84 (d, J = 7.6 Hz, 1H), 6.39 (d, J = 16.1 Hz, 1H), 4.91 (s, 2H), 4.84 (d, J = 7.6 Hz, 1H), 3.99 (d, J = 6.4 Hz, 2H), 3.90 – 3.82 (m, 1H), 3.81 – 3.68 (m, J = 9.7, 5.0 Hz, 3H), 3.69 – 3.58 (m, J = 16.1, 7.9 Hz, 2H), 3.21 (s, 3H), 3.16 (s, 1H), 2.61 (s, 1H), 1.93 – 1.68 (m, 12H). <sup>13</sup>C NMR (101 MHz, CDCl<sub>3</sub>) δ 229.19, 190.05, 174.44, 170.37, 157.42, 157.17, 142.84, 140.80, 139.15, 133.77, 130.46, 129.34, 128.53, 122.66, 122.30, 118.13, 116.86, 113.12, 101.15, 74.85, 73.28, 70.98, 70.25, 68.81, 61.19, 58.00, 39.20, 39.04, 37.07, 32.42, 30.44, 29.71, 28.22, 20.75. MS (ES<sup>-</sup>): *m/z* calc. for C<sub>34</sub>H<sub>40</sub>O<sub>10</sub>: 608.26 ; found: 607.4 [M-H]<sup>-</sup>.

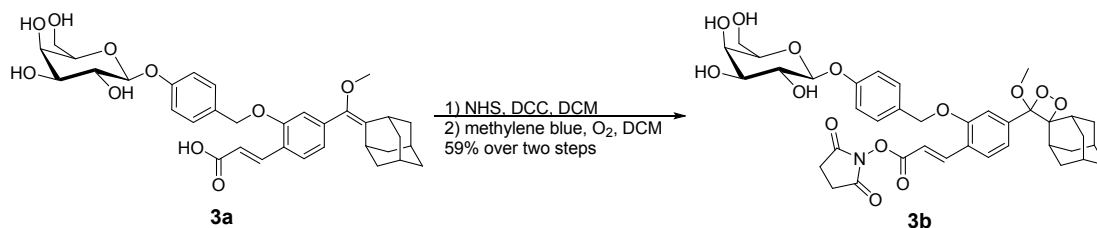

### Compound 3b

Compound **3a** (150 mg, 0.246 mmol, 1 eq) was dissolved in 1.5 ml of DCM and cooled to 0°C. N-hydroxysuccinimide (57 mg, 0.49 mmol, 2 eq) was added followed by N,N'-Dicyclohexylcarbodiimide (76 mg, 0.37 mmol, 1.5eq). The reaction was allowed to warm up to room temperature and monitored by RP-HPLC. Upon completion, 5 ml of DCM were added, followed by catalytic amount of methylene

blue. Oxygen was bubbled through the solution, while irradiating with yellow light. The reaction was monitored by RP-HPLC (50-100% ACN in water, 20 min). Upon completion, the reaction mixture was concentrated by evaporation under reduced pressure and the crude product was purified by preparative RP-HPLC (50-100% ACN in water, 20 min) to afford compound **3b** (61 mg, 34% yield) as a white solid. <sup>1</sup>H NMR (400 MHz, CDCl<sub>3</sub>+MeOD) δ 8.10 (d, *J* = 16.2, 1H), 7.49 (d, *J* = 18.9 Hz, 1H), 7.45 – 7.14 (m, 3H), 7.15 – 6.81 (m, 3H), 6.67 (d, *J* = 16.2 Hz, 1H), 5.07 (m, 2H), 4.79 (d, *J* = 7.6 Hz, 1H), 3.99 – 3.75 (m, 6H), 3.75 – 3.65 (m, 2H), 3.58 (d, *J* = 6.4 Hz, 2H), 3.11 (s, 3H), 2.91 (s, 1H), 2.75 (s, 3H), 1.98 (s, 1H), 1.92 (s, 1H), 1.66 (m, 9H), 1.38 (d, *J* = 11.6 Hz, 1H), 1.28 – 1.18 (m, 1H), 1.14 (d, *J* = 12.9 Hz, 1H). <sup>13</sup>C NMR (101 MHz, CDCl<sub>3</sub>+MeOD) δ 170.17, 162.69, 157.78, 157.33, 144.77, 139.64, 129.94, 129.79, 129.20, 123.59, 116.86, 113.04, 111.72, 101.19, 95.81, 74.83, 73.40, 70.91, 70.41, 68.66, 61.13, 50.01, 36.22, 34.72, 33.56, 33.18, 33.09, 32.22, 31.67, 31.48, 25.94, 25.76, 25.62, 25.49, 24.85. MS (ES<sup>+</sup>): *m/z* calc. for C<sub>38</sub>H<sub>43</sub>NO<sub>14</sub>: 737.75; found: 760.6 [M+Na]<sup>+</sup>.

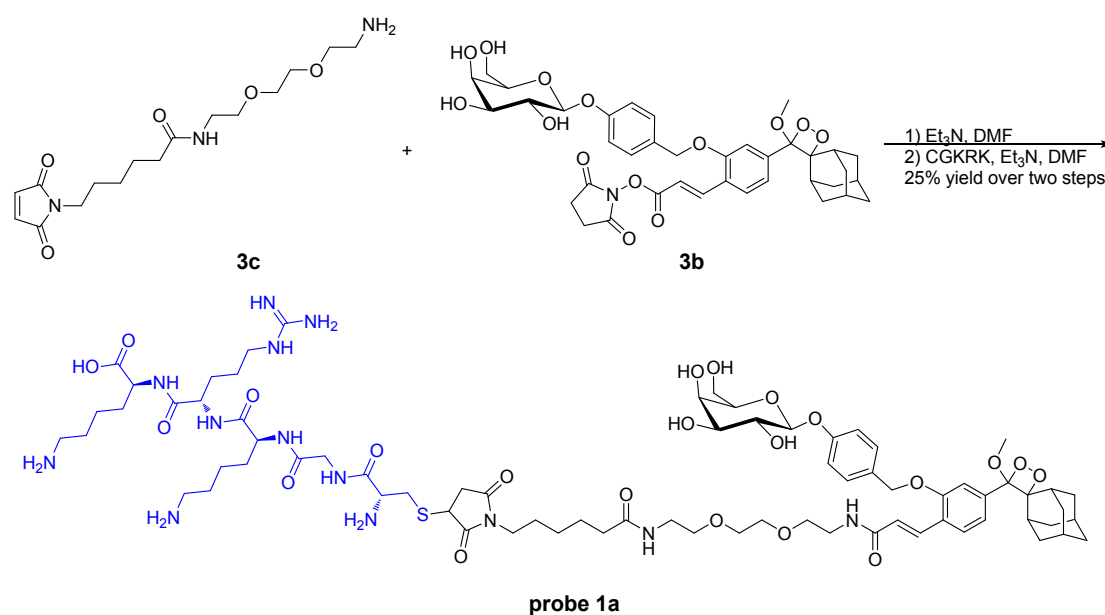

### Probe 1a

Compound **3c**<sup>[2]</sup> (54 mg, 0.073 mmol, 1 eq) and compound **3b** (27 mg, 0.08 mmol, 1 eq) were dissolved in DMF (0.5 ml) and a few drops of Et<sub>3</sub>N were added. The Reaction was monitored by RP-HPLC (30-100% ACN in water, 20 min). Upon completion, **CGKRK**<sup>[3]</sup> (92 mg, 0.088 mmol, 1.2 eq) was added. The Reaction was monitored by RP-HPLC (30-100% ACN in water, 20 min). Upon completion, the

reaction mixture was concentrated by evaporation under reduced pressure. The crude product was purified by preparative RP-HPLC (30-100% ACN in water, 20 min) to afford compound **probe 1a** (36 mg, 25% yield) as a white solid. HRMS (ES<sup>-</sup>): *m/z* calc. for C<sub>73</sub>H<sub>111</sub>N<sub>13</sub>O<sub>22</sub>S: 1553.73; found: MH<sup>+</sup> 1554.7772.

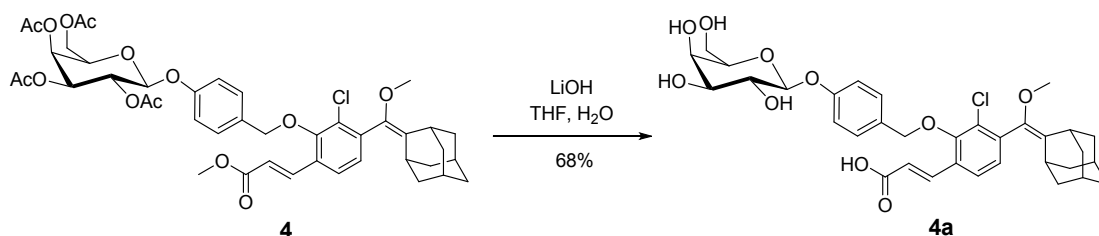

### Compound 4a

Enol ether **4**<sup>[1]</sup> (120 mg, 0.147 mmol, 1 eq), LiOH (21.3 mg, 0.887 mmol, 6 eq) were dissolved in 2 ml of 4:1 solution THF:H<sub>2</sub>O. Reaction mixture was stirred at room temperature and monitored via RP-HPLC. Upon completion, reaction mixture was diluted with EtOAc and washed with saturated aqueous solution NH<sub>4</sub>Cl followed by brine. Organic phase was dried over Na<sub>2</sub>SO<sub>4</sub> and concentrated under reduced pressure to afford 64 mg (68% yield) of yellow solid. <sup>1</sup>H NMR (400 MHz, CDCl<sub>3</sub>) δ 7.95 – 7.84 (m, *J* = 16.1 Hz, 1H), 7.41 (d, *J* = 8.0 Hz, 1H), 7.26 (d, *J* = 8.6 Hz, 2H), 7.01 (d, *J* = 8.5 Hz, 2H), 6.89 (s, 1H), 6.84 (d, *J* = 7.6 Hz, 1H), 6.39 (d, *J* = 16.1 Hz, 1H), 4.91 (s, 2H), 4.84 (d, *J* = 7.6 Hz, 1H), 3.99 (d, *J* = 6.4 Hz, 2H), 3.90 – 3.82 (m, 1H), 3.81 – 3.68 (m, *J* = 9.7, 5.0 Hz, 3H), 3.69 – 3.58 (m, *J* = 16.1, 7.9 Hz, 2H), 3.21 (s, 3H), 3.16 (s, 1H), 2.61 (s, 1H), 1.93 – 1.68 (m, 12H). <sup>13</sup>C NMR (101 MHz, CDCl<sub>3</sub>) δ 169.83, 157.47, 153.79, 140.13, 139.46, 138.22, 132.53, 130.98, 130.08, 129.82, 129.62, 127.79, 124.88, 119.21, 116.93, 100.95, 74.74, 73.92, 73.27, 72.36, 71.18, 70.01, 69.18, 64.50, 61.42, 39.14, 38.70, 37.70, 37.07, 35.61, 33.91, 30.26, 29.76, 29.03, 28.26. MS (ES<sup>-</sup>): *m/z* calc. for C<sub>34</sub>H<sub>39</sub>ClO<sub>10</sub>: 642.22 ; found: 641.5 [M-H]<sup>-</sup>.

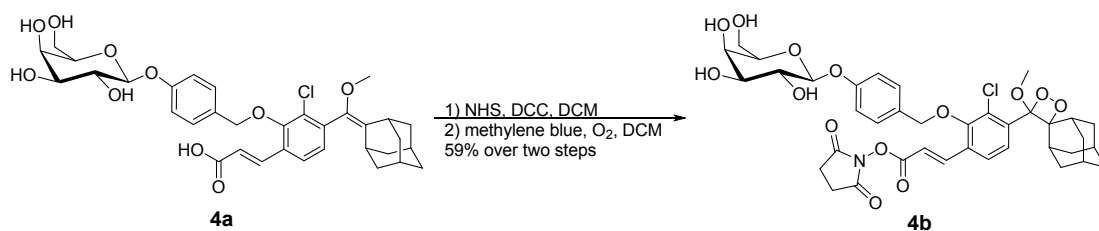

### Compound 4b

Compound **4a** (209 mg, 0.323 mmol, 1 eq) was dissolved in 1.5 ml of DCM and cooled to 0°C. N-hydroxysuccinimide (75 mg, 0.634 mmol, 2 eq) was added followed by N,N'-Dicyclohexylcarbodiimide (100 mg, 0.488 mmol, 1.5eq). The reaction was allowed to warm up to room temperature and monitored by RP-hplc. Upon completion, 5 ml of DCM were added, followed by catalytic amount of methylene blue. Oxygen was bubbled through the solution, while irradiating with yellow light. The reaction was monitored by RP-HPLC (50-100% ACN in water, 20 min). Upon completion, the reaction mixture was concentrated by evaporation under reduced pressure and the crude product was purified by preparative RP-HPLC (50-100% ACN in water, 20 min) to afford compound **4b** (138 mg, 59% yield) as a white solid. <sup>1</sup>H NMR (400 MHz, CDCl<sub>3</sub>+MeOD) δ 7.93 – 7.83 (m, 2H), 7.52 (d, *J* = 8.3 Hz, 1H), 7.21 (d, *J* = 8.1 Hz, 2H), 6.96 (d, *J* = 8.1 Hz, 2H), 6.47 (d, *J* = 16.3 Hz, 1H), 4.94 – 4.78 (m, 2H), 3.94 (s, 1H), 3.82 – 3.49 (m, 8H), 3.16 (s, 3H), 2.95 (s, 1H), 2.81 (s, 4H), 2.25 (d, *J* = 11.5 Hz, 1H), 1.92 (s, 1H), 1.80 – 1.49 (m, 8H), 1.41 (d, *J* = 12.4 Hz, 1H), 1.24 (dd, *J* = 24.2, 12.8 Hz, 2H).

<sup>13</sup>C NMR (101 MHz, CDCl<sub>3</sub>+MeOD) δ 170.10, 161.77, 157.85, 154.61, 143.63, 136.49, 130.89, 129.42, 129.01, 127.92, 125.51, 116.79, 114.34, 111.73, 101.14, 96.55, 76.34, 74.88, 73.29, 70.98, 68.88, 61.40, 36.48, 33.87, 33.58, 32.59, 32.15, 31.52, 26.11, 25.78, 25.63. MS (ES<sup>+</sup>): *m/z* calc. for C<sub>38</sub>H<sub>42</sub>ClNO<sub>14</sub>: 771.23; found: 772.6 [M+H]<sup>+</sup>.

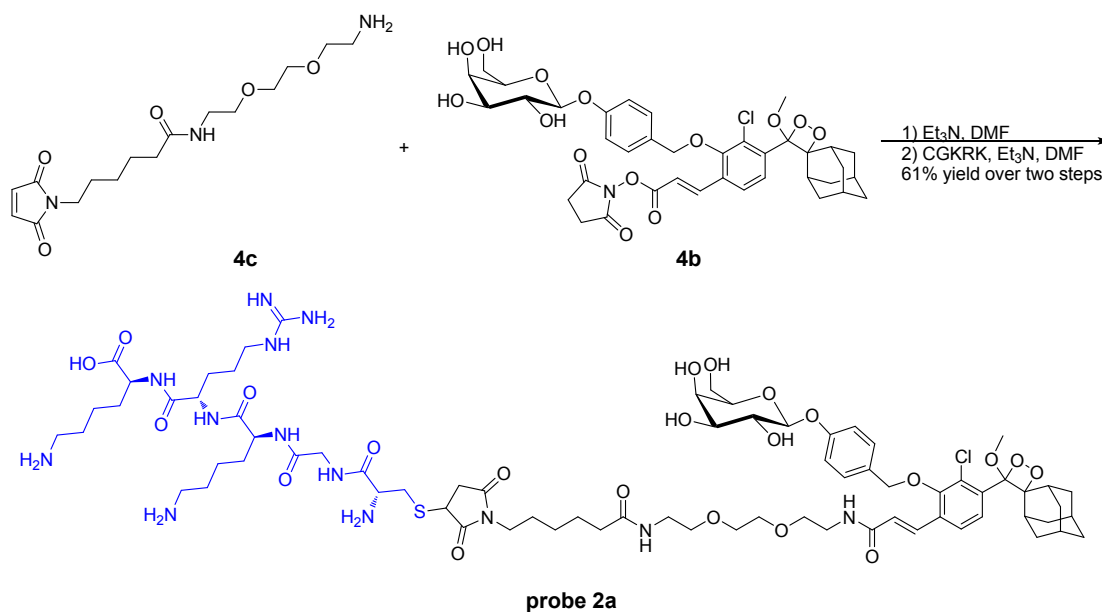

### Probe 2a

Compound **4c**<sup>[2]</sup> (5.3 mg, 0.015 mmol, 1 eq) and compound **4b** (10 mg, 0.013 mmol, 1 eq) were dissolved in DMF (0.5 ml) and a few drops of Et<sub>3</sub>N were added. The Reaction was monitored by RP-HPLC (30-100% ACN in water, 20 min). Upon completion, **CGKRK**<sup>[3]</sup> (15 mg, 0.014 mmol, 1.1 eq) was added. The Reaction was monitored by RP-HPLC (30-100% ACN in water, 20 min). Upon completion, the reaction mixture was concentrated by evaporation under reduced pressure. The crude product was purified by preparative RP-HPLC (30-100% ACN in water, 20 min) to afford compound **probe 2a** (16.2 mg, 61% yield) as a white solid. HRMS (ES<sup>-</sup>): *m/z* calc. for C<sub>73</sub>H<sub>110</sub>ClN<sub>13</sub>O<sub>22</sub>S: 1587.73; found: MH<sup>+</sup> 1588.7365.

# H-NMR, C-NMR, MS and/or HPLC Spectra of Key Compounds

## Compound 3a

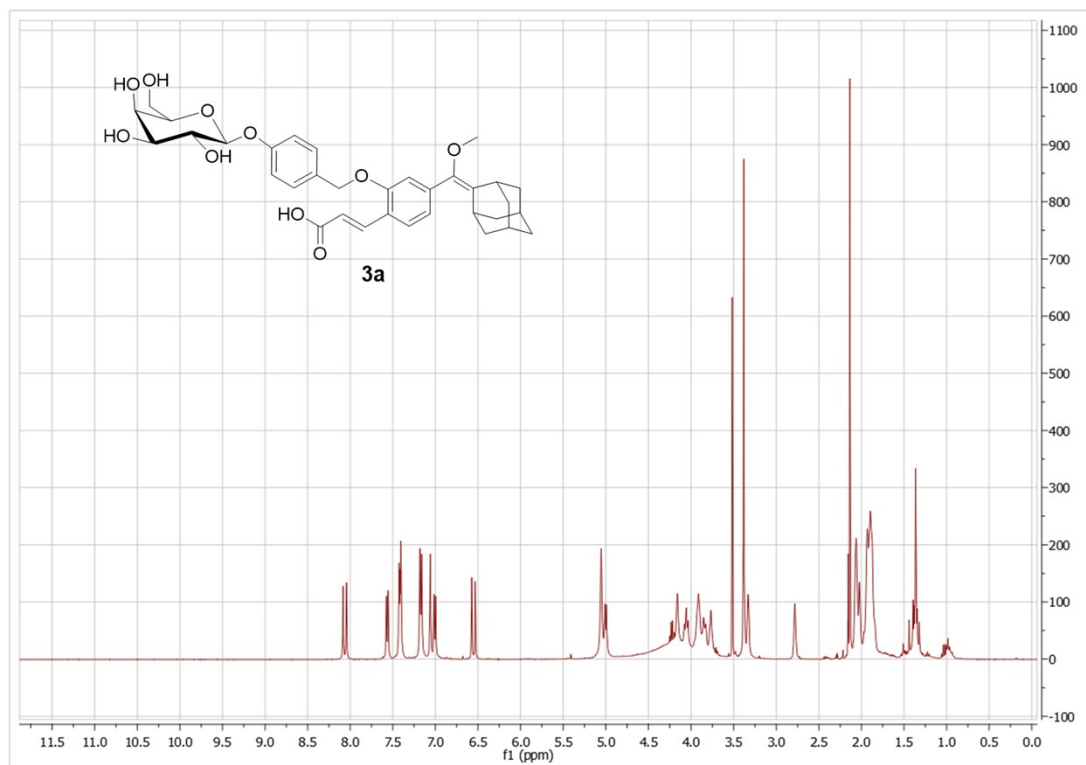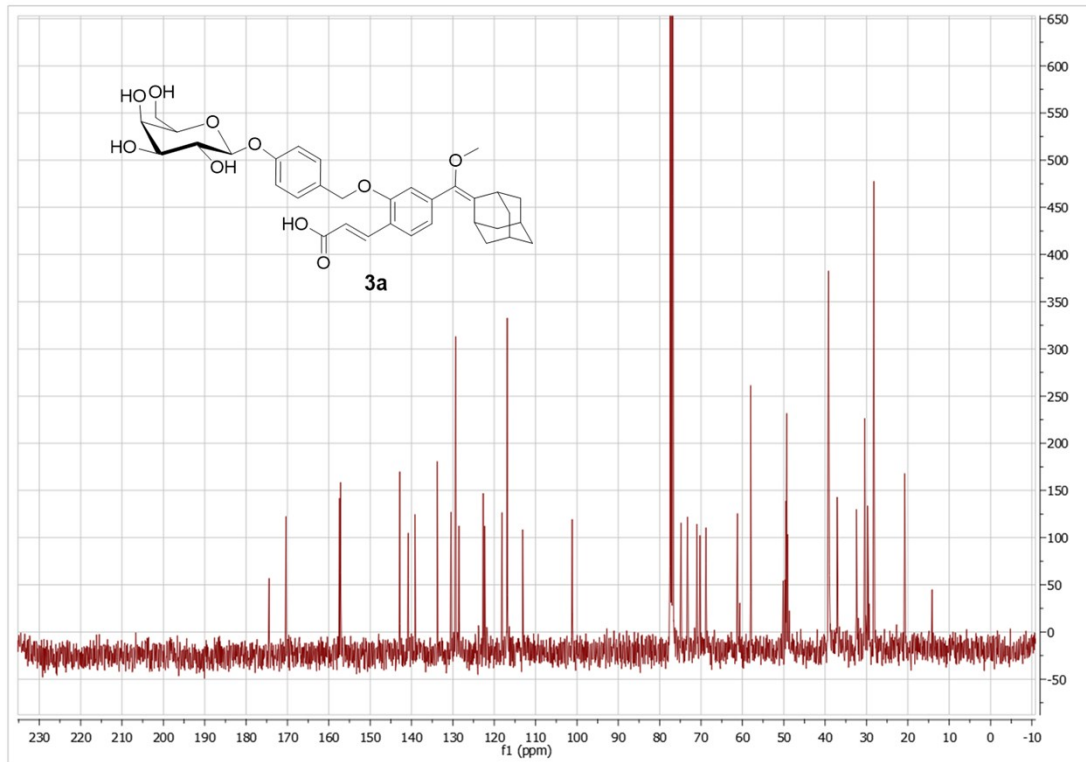

2: MS2 ES-  
3.51e6

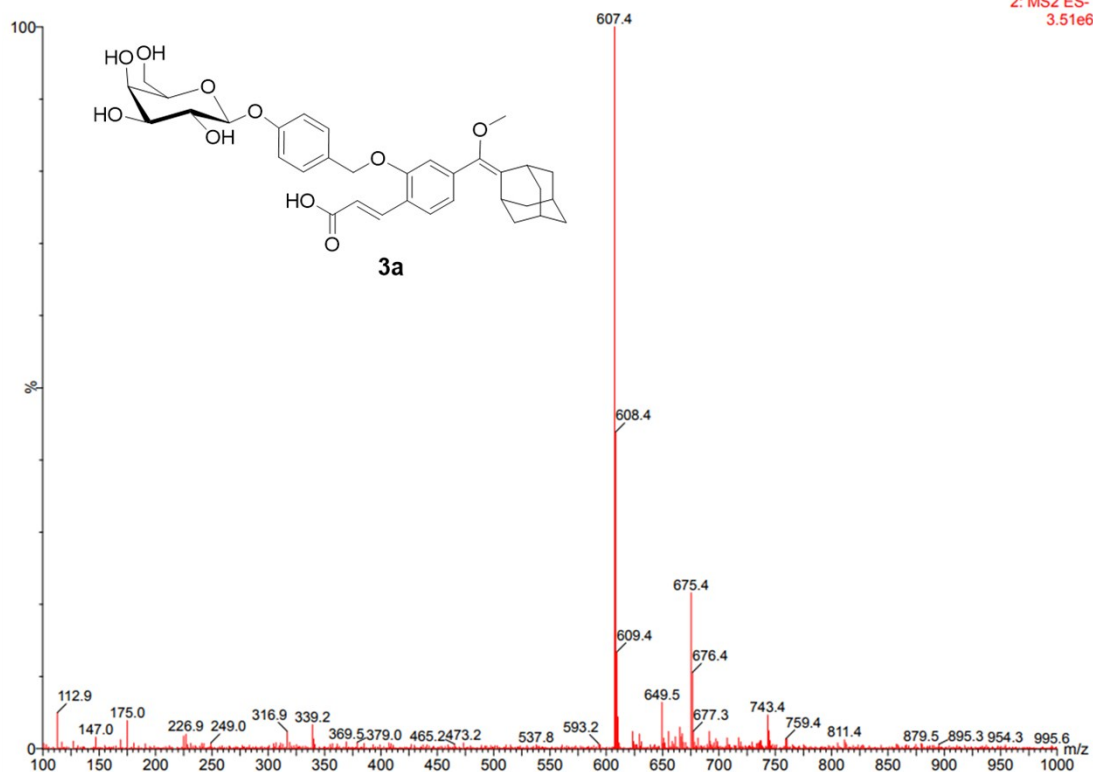

# Compound 3b

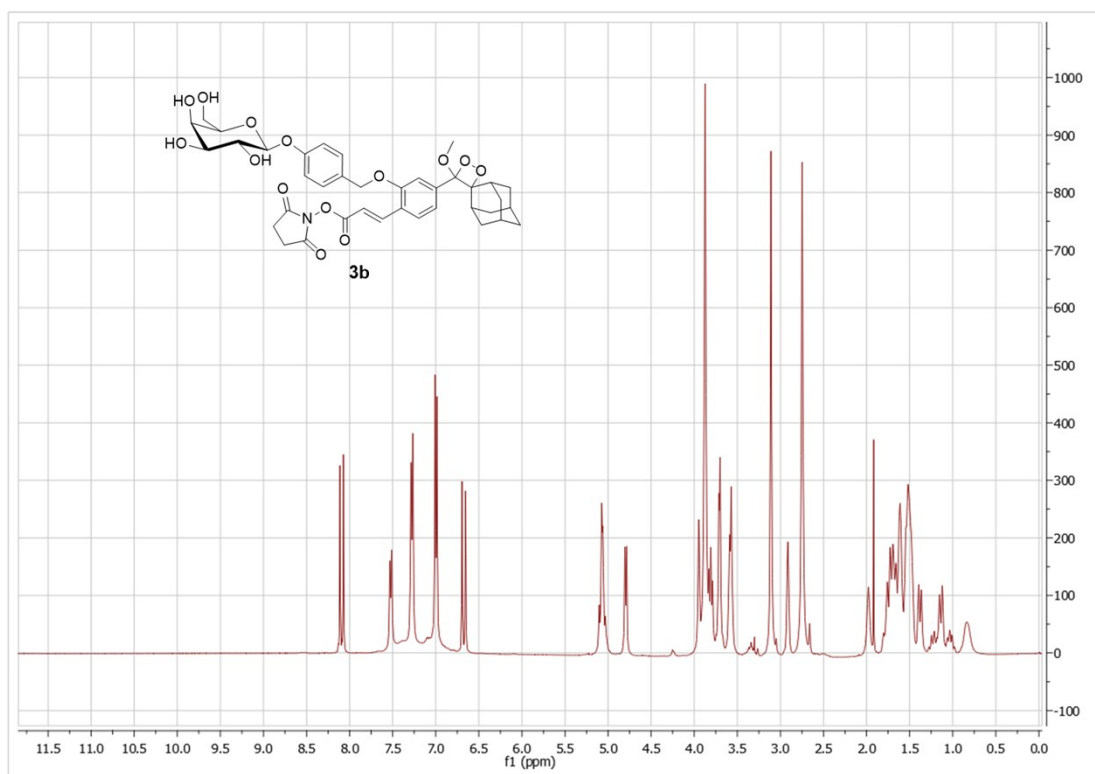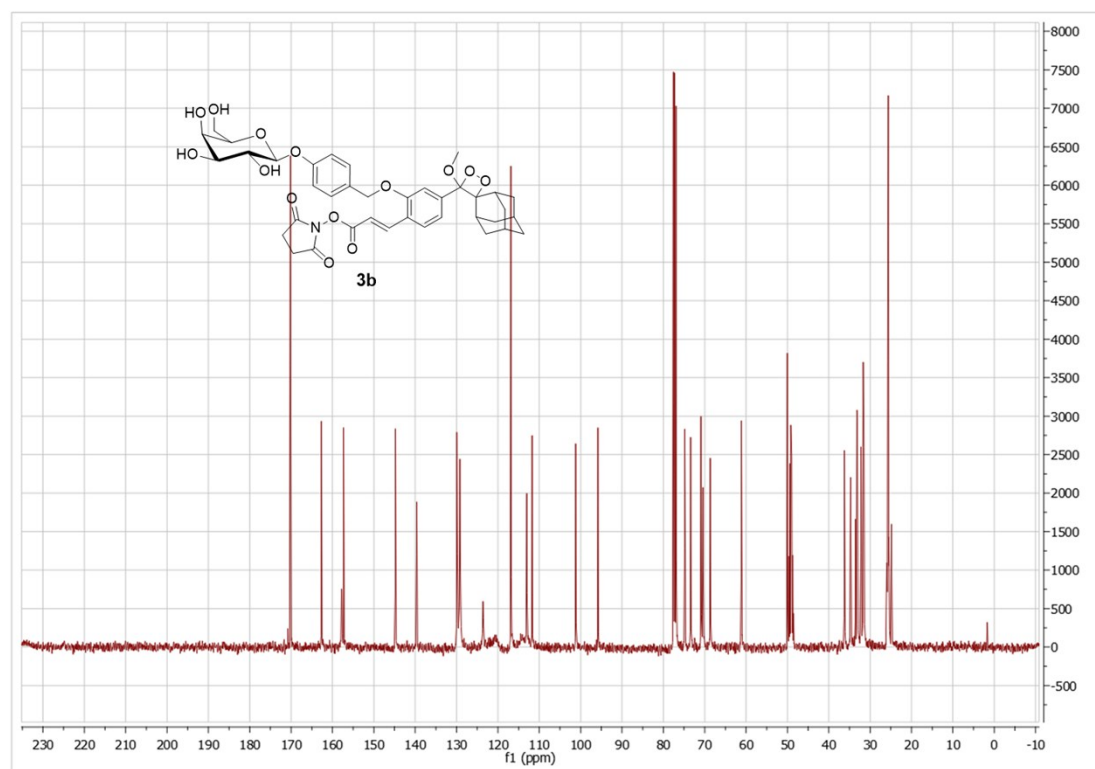



1: MS2 ES+  
1.32e7

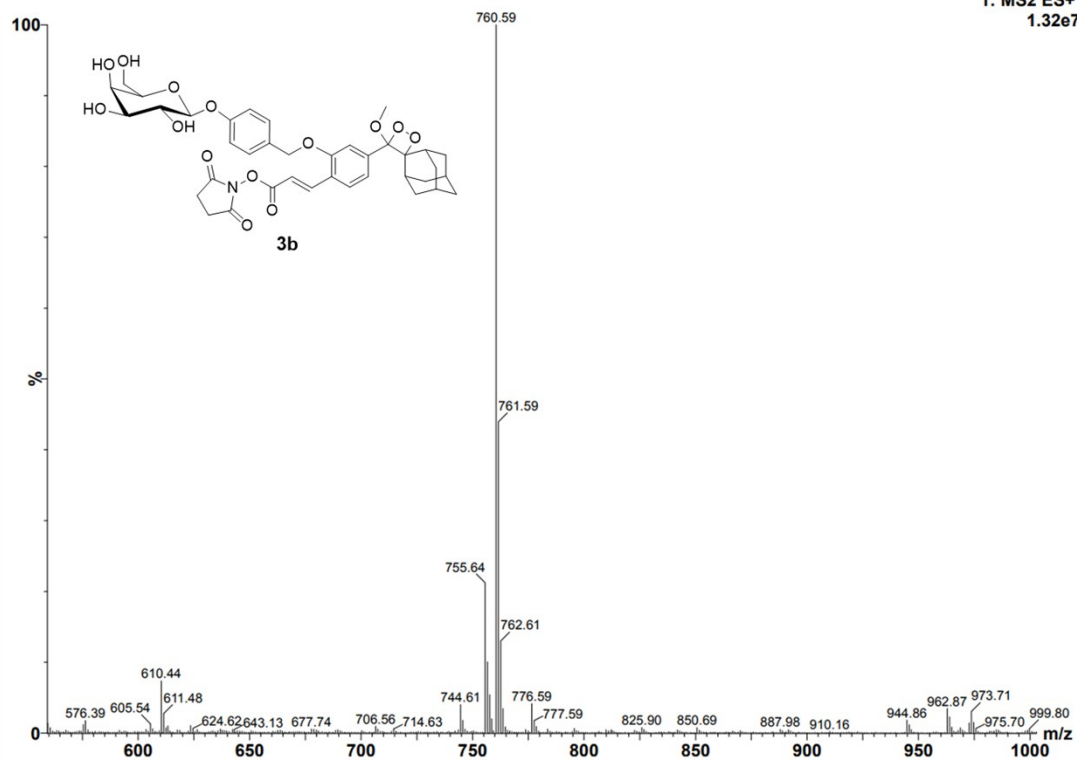

# Probe 1a

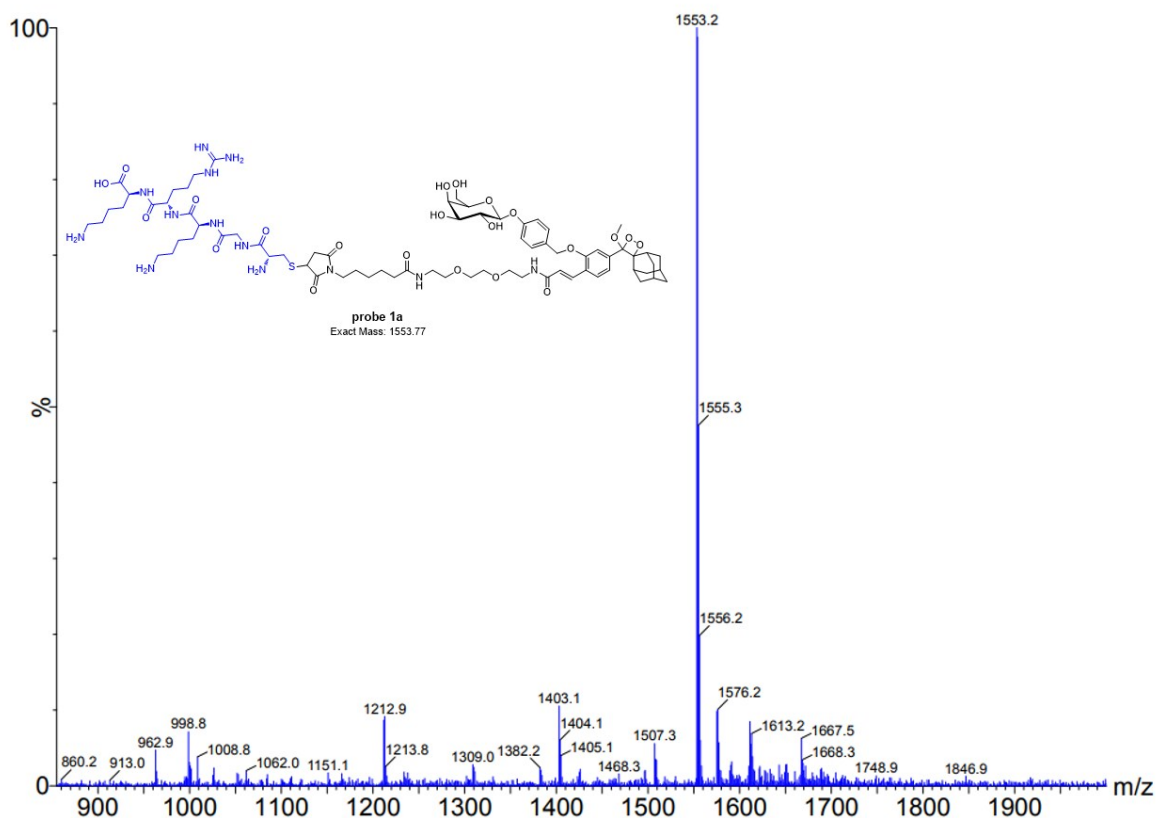

## Elemental Composition Report

Page 1

### Single Mass Analysis

Tolerance = 2.0 PPM / DBE: min = -1.5, max = 200.0

Element prediction: Off

Number of isotope peaks used for i-FIT = 3

Monoisotopic Mass, Even Electron Ions

66 formula(e) evaluated with 3 results within limits (all results (up to 1000) for each mass)

Elements Used:

C: 72-74 H: 105-115 N: 10-18 O: 18-25 S: 0-1 Cl: 0-1

3-168

SHABAT214 52 (2.296) Cm (49.52)

Ori Green

1: TOF MS ES+  
4.65e+002

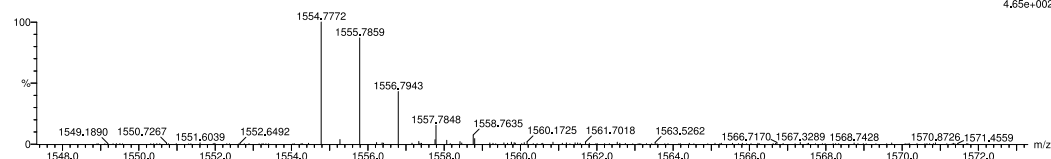

Minimum:

Maximum:

5.0 2.0 -1.5  
200.0

| Mass      | Calc. Mass | mDa  | PPM  | DBE  | i-FIT | i-FIT (Norm) | Formula               |
|-----------|------------|------|------|------|-------|--------------|-----------------------|
| 1554.7772 | 1554.7766  | 0.6  | 0.4  | 24.5 | 32.3  | 0.7          | C73 H112 N13 O22 S    |
|           | 1554.7779  | -0.7 | -0.5 | 29.5 | 32.2  | 0.6          | C74 H108 N17 O18 S    |
|           | 1554.7797  | -2.5 | -1.6 | 24.5 | 38.2  | 6.6          | C73 H113 N15 O18 S Cl |

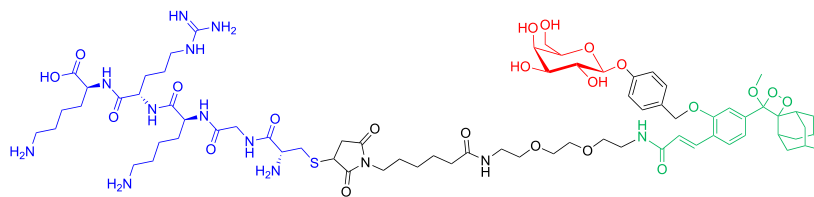

Chemical Formula: C<sub>73</sub>H<sub>111</sub>N<sub>13</sub>O<sub>22</sub>S

Exact Mass: 1553.77

Molecular Weight: 1554.82

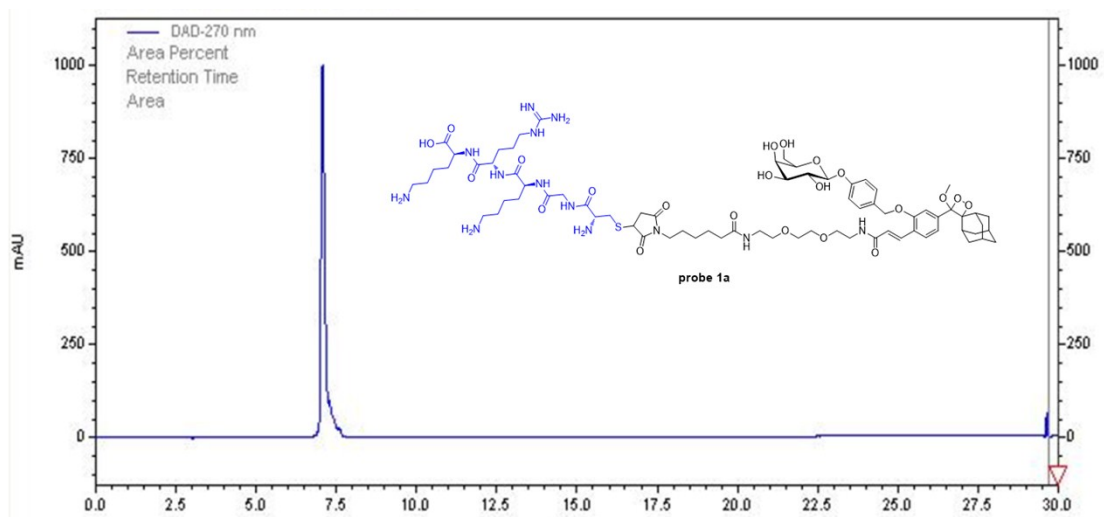

RP-HPLC chromatogram of probe **1a** ( $\lambda = 270$  nm). C18 column. Eluent: 30%-90% ACN in H<sub>2</sub>O (0.1% TFA).

### Compound 4a

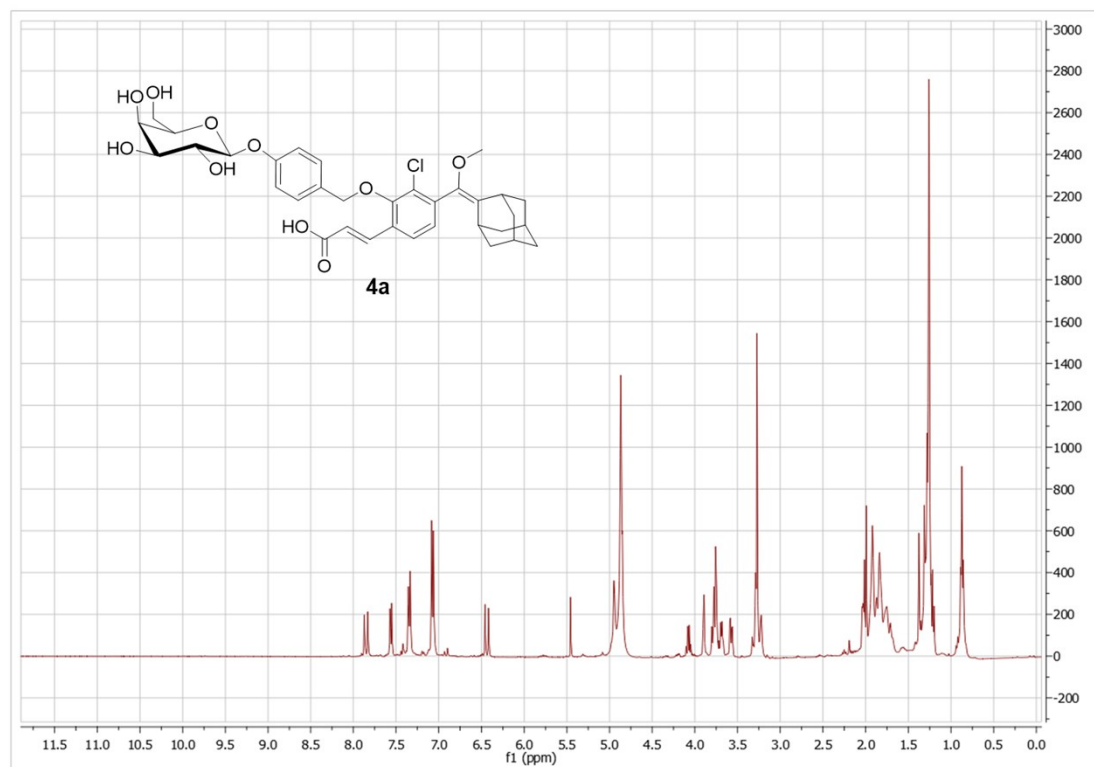

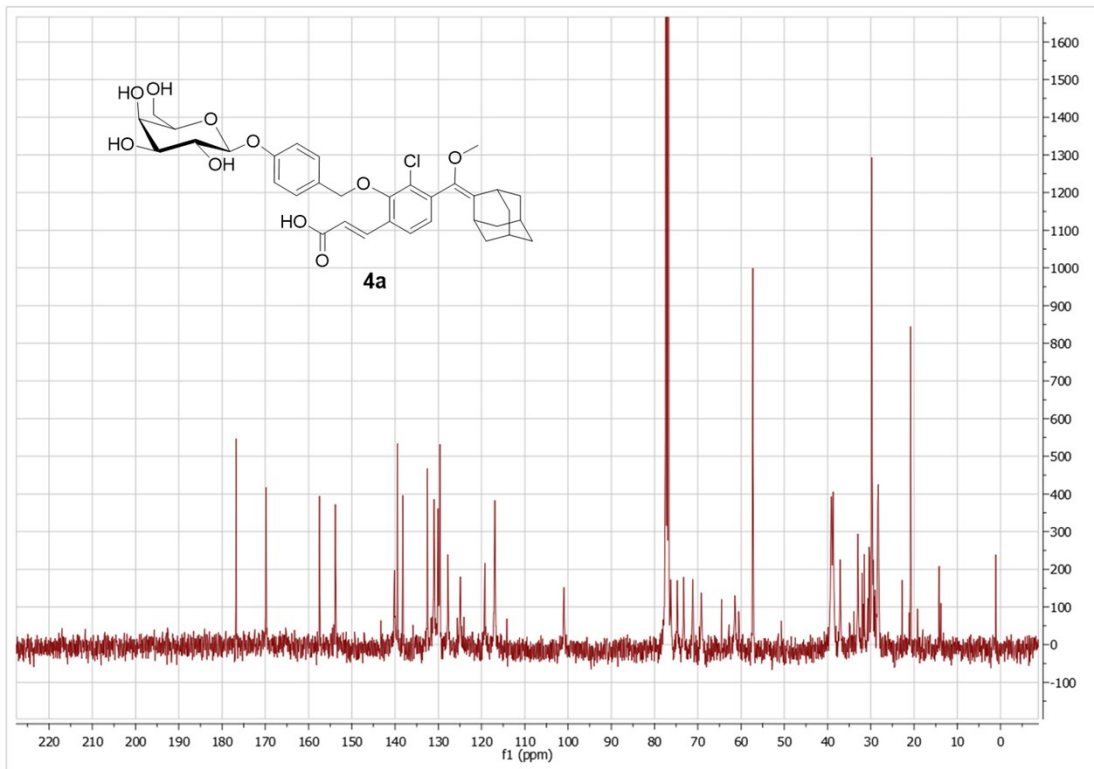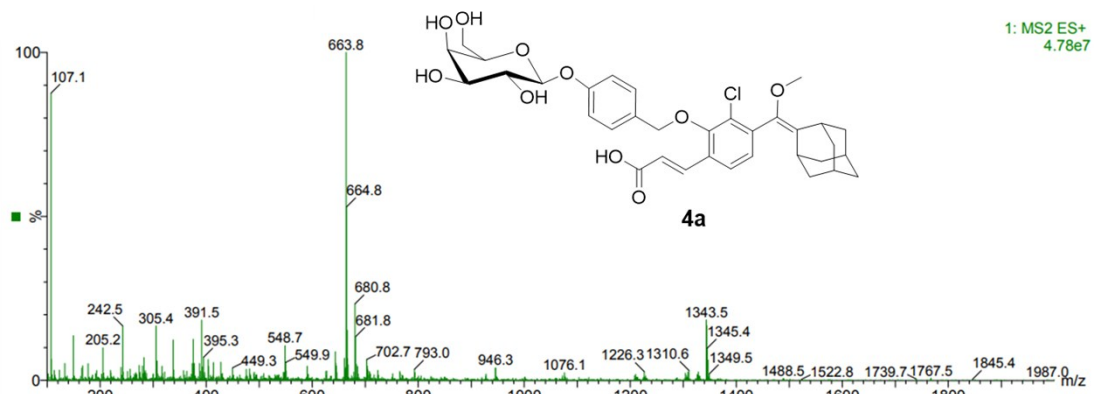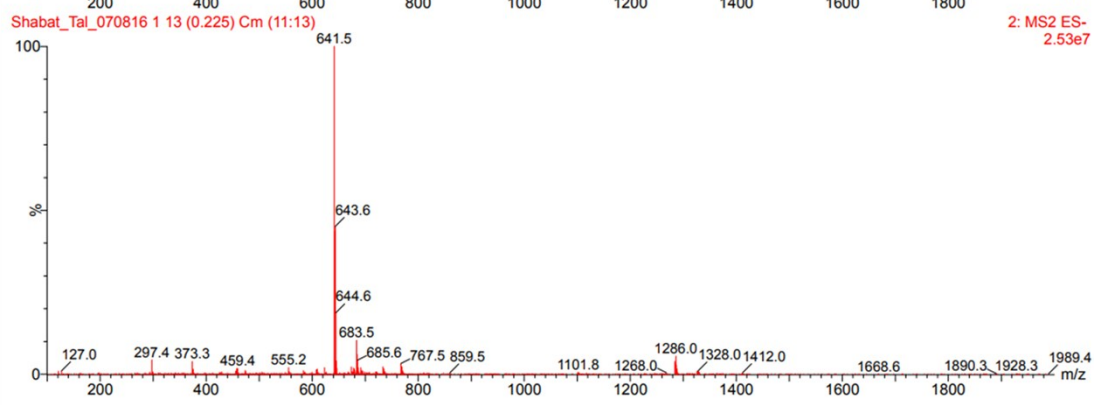

# Compound 4b

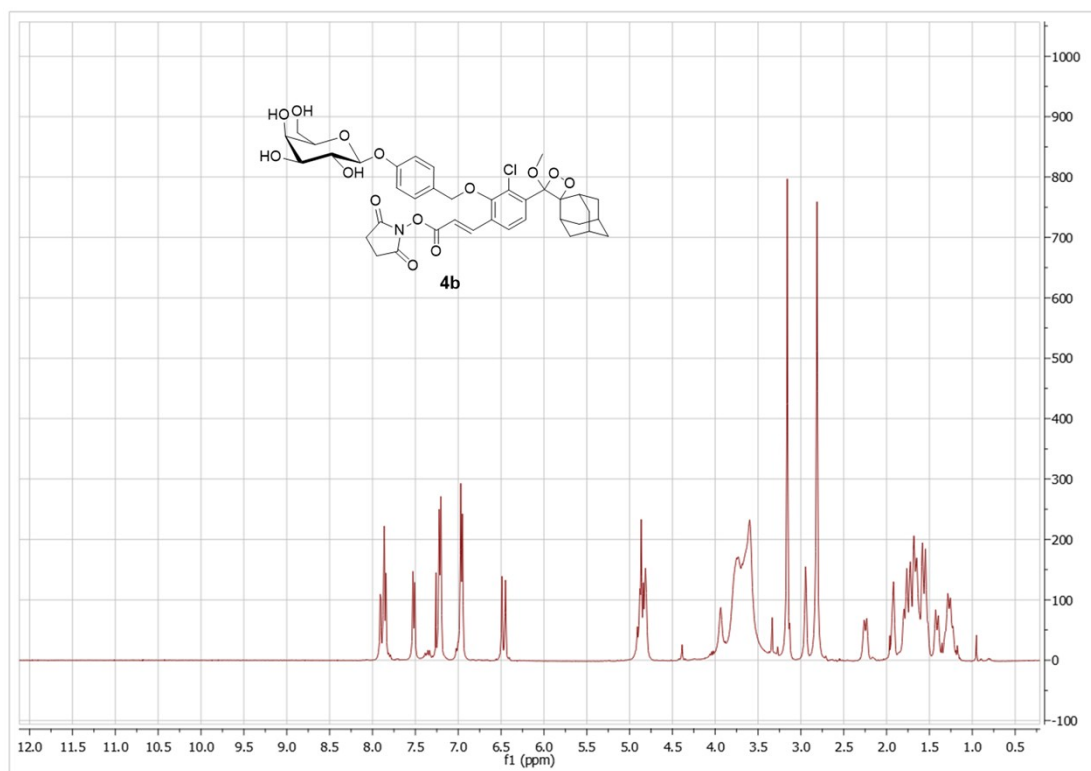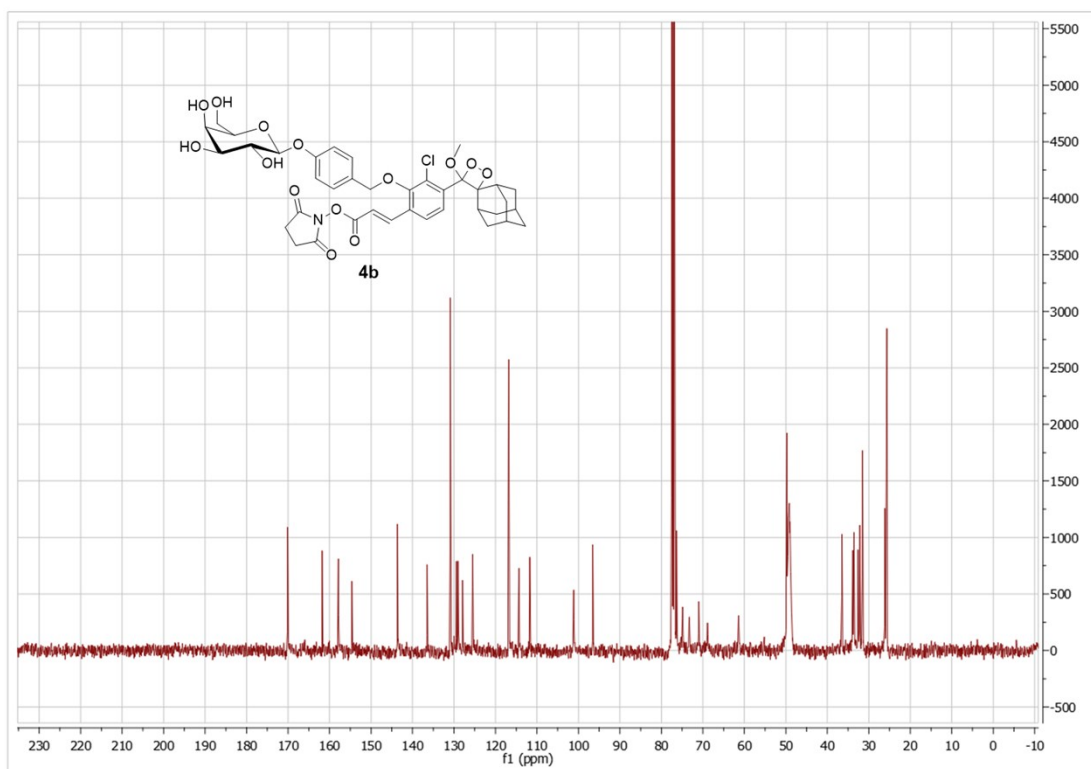

## Probe 2a

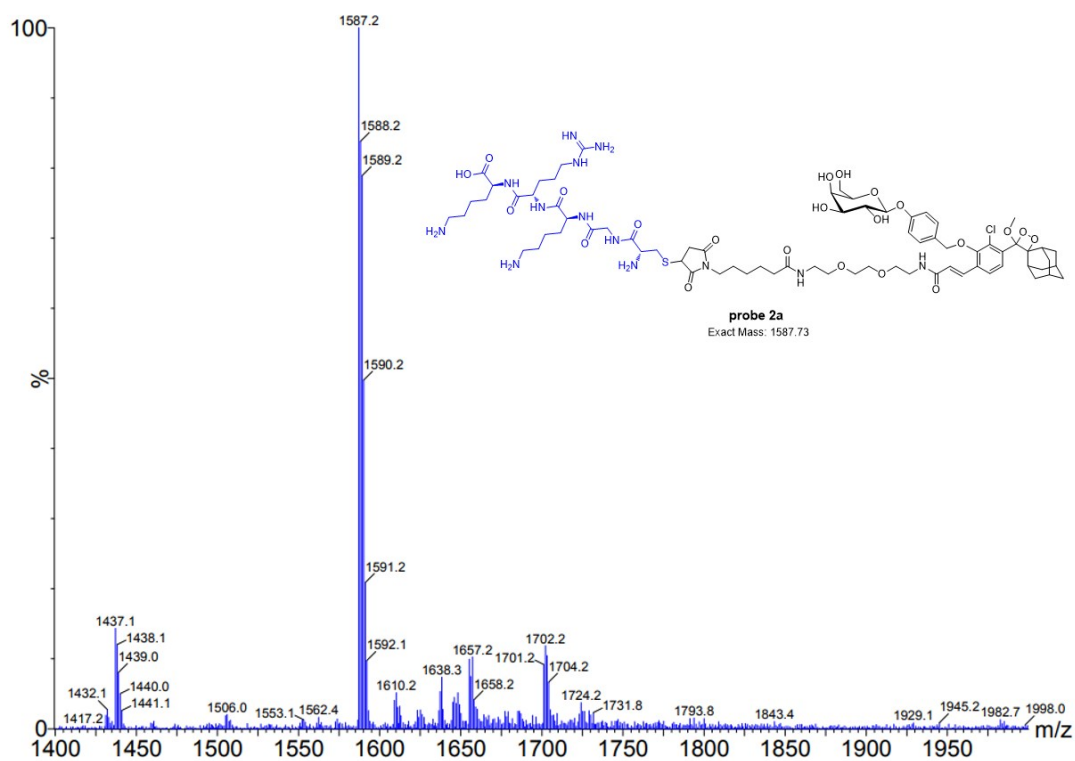

### Elemental Composition Report

Page 1

#### Single Mass Analysis

Tolerance = 2.0 PPM / DBE: min = -1.5, max = 200.0

Element prediction: Off

Number of isotope peaks used for i-FIT = 3

Monoisotopic Mass, Odd and Even Electron Ions  
55 formula(e) evaluated with 3 results within limits (all results (up to 1000) for each mass)

Elements Used:

C: 72-74 H: 105-115 N: 10-18 O: 18-25 S: 0-1 Cl: 0-1

3-125

SHABAT213b 14 (0.630) Cm (14)

Orl Green

1: TOF MS ES+  
4.37e+002

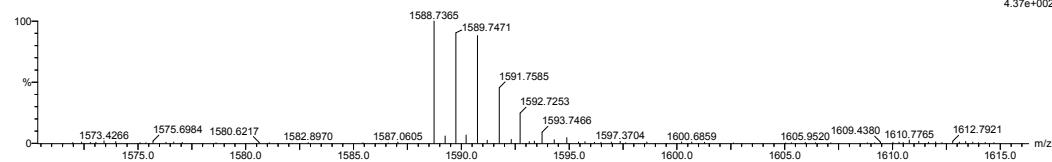

Minimum:

Maximum: 5.0 2.0 -1.5 200.0

| Mass      | Calc. Mass | mDa  | PPM  | DBE  | i-FIT | i-FIT (Norm) | Formula               |
|-----------|------------|------|------|------|-------|--------------|-----------------------|
| 1588.7365 | 1588.7358  | 0.7  | 0.4  | 29.5 | 37.1  | 6.5          | C74 H106 N15 O22 S    |
|           | 1588.7376  | -1.1 | -0.7 | 24.5 | 31.6  | 0.9          | C73 H111 N13 O22 S Cl |
|           | 1588.7389  | -2.4 | -1.5 | 29.5 | 31.2  | 0.5          | C74 H107 N17 O18 S Cl |

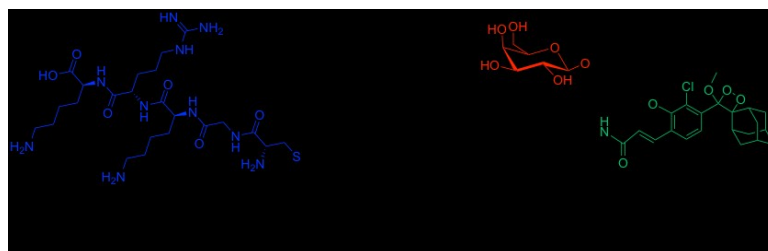

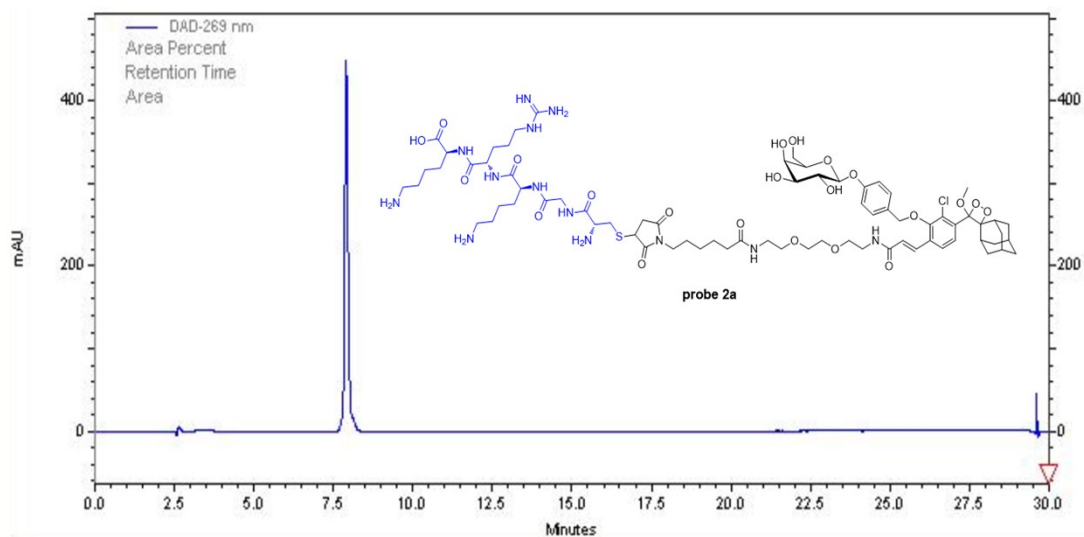

RP-HPLC chromatogram of probe **2a** ( $\lambda = 270$  nm). C18 column. Eluent: 30%-90% ACN in H<sub>2</sub>O (0.1% TFA).

## **In vitro Experiments**

### **Cell Culture**

Murine colon carcinoma CT26.wt and CT26.CL5 cells were purchased from the American Type Culture Collection (ATCC Manassas, VA, USA). CT26.WT cell line was cultured in RPMI 1640 growing media supplemented with 10% FBS, 100 µg/mL streptomycin, 100 units/mL penicillin, 12.5 units/mL nystatin and 2 mM L-glutamine. CT26.CL25 cell line was cultured in RPMI 1640 growing media supplemented with 10% FBS, 100 µg/mL streptomycin, 100 units/mL penicillin, 12.5 units/mL nystatin, 2 mM L-glutamine, 4.5 g/L glucose, 10 mM HEPES and 1.0 mM sodium pyruvate and supplemented with 0.1 mM non-essential amino-acids and 0.4 mg/ml G418. Cells were grown at 37°C; 5% CO<sub>2</sub>.

### **Chemiluminescence imaging in living cells**

CT26.wt and CT26.CL5 cells (40,000 cells/well) were seeded in 96 well corning clear bottom plates with their growth medium. Following 24 h, medium was replaced and to a fresh growth medium with materials **1**, **1a**, **2**, **2a** [5 µM]. Cells were immediately imaged using BioSpace Lab PhotonIMAGER™ for 30 min. The experiment was repeated 3 times.

## **In vivo Experiments**

### **Ethics Statement**

All animal procedures were performed in compliance with Tel Aviv University, Sackler School of Medicine (Tel Aviv, Israel) guidelines, and protocols were approved by the Tel Aviv University Institutional Animal Care and Use Committee (IACUC).

### **Intravital non-invasive chemiluminescence imaging**

Six 7-weeks old BALB/c female mice (Harlan Laboratories Israel Ltd., Jerusalem, Israel) were anesthetized using a mixture of ketamine (100 mg/kg) and xylazine (12 mg/kg) injected subcutaneously. Then, mice were injected subcutaneously with 50 µL of the materials **1**, **1a**, **2** or **2a**, previously incubated in PBS 7.4 (in the presence or absence of betagalactosidase) for 30 min. The mice were imaged and



chemiluminescence was monitored for up to 30 min by intravital non-invasive bioluminescence imaging system (Photon Imager; Biospace Lab, Paris, France). Images were obtained by Photo-Acquisition software (Biospace Lab) and analyzed by M3Vision Software (Biospace Lab). In addition, 30 6-weeks old BALB/c female mice (Harlan Laboratories Israel Ltd., Jerusalem, Israel) were inoculated subcutaneously with  $1 \times 10^6$  murine CT26 cells. 15 mice were inoculated with CT26-wt and 15 with CT26.Cl25. tumor growth was monitored q.o.d. until tumors were  $\sim 350 \text{ mm}^3$ . Mice were anesthetized using a mixture of ketamine (100 mg/kg) and xylazine (12 mg/kg) injected subcutaneously. Then, mice were injected with 100  $\mu\text{L}$  of the materials A, B, C or D, or saline control by intra-tumoral injection. The mice were imaged and chemiluminescence was monitored for up to 30 min by intravital non-invasive bioluminescence imaging system (Photon Imager; Biospace Lab, Paris, France). Images were obtained by Photo-Acquisition software (Biospace Lab) and analyzed by M3Vision Software (Biospace Lab).

Chemiluminescence signal was quantified as total signal of photons/exposure time (sec)/ tumor size ( $\text{mm}^3$ ). Data is expressed as mean  $\pm$  S.D.

## References

- [1] O. Green, T. Eilon, N. Hananya, S. Gutkin, C. R. Bauer, D. Shabat, *ACS Cent. Sci.* **2017**, *3*, 349–358.
- [2] *Chem. Biol.* **2011**, *18*, 1261–1272.
- [3] D. Shabat, M. Roth-Konforti, C. Bauer, *Angew. Chemie Int. Ed.* **2017**, DOI 10.1002/anie.201709347.
